# Supplementary material
Source: PubMed Central journal article supplement (PMC4907386)
Supplement: supp_btv688_suppl.pdf [file supp_btv688_suppl.pdf]

## 1 SUPPLEMENTARY MATERIALS

### 1.1 Command line options

All assemblers were run in 16 threads with command line options and recommended parameters. For PBcR, the options were *length 500 -partitions 200 -s pacbio.spec -t 16* where *pacbio.spec* file contained one string *"merSize=14"*. Cerulean was run without any additional options except the thread quantity; blasr used by Cerulean was run as recommended with options *-minMatch 10 -minPctIdentity 70 -bestn 30 -nCandidates 30 -maxScore -500 -nproc 16 -noSplitSubreads*. SPAdes was run with no command line options except *-t 16*

### 1.2 Time and memory usage

All benchmarking was performed on 64 cores server with 1Tb of memory in 16 threads. The provided running times are rough estimates since the server was used by various other tools at the same time.

**Table 1.** Memory usage in gigabytes

|            | Memory       |          |          |            |
|------------|--------------|----------|----------|------------|
|            | HYBRIDSPADES | Cerulean | selfPBcR | hybridPBcR |
| ECOLI100   | 9            | 3        | 32       | 95         |
| ECOLI200   | 9            | 5        | 76       | 131        |
| ECOLI-NANO | 9            | -        | -        | -          |
| MRUBER     | 5            | 2        | 28       | 17         |
| STREPTO    | 9            | 3        | -        | 6          |
| TM6        | 9            | 3        | 20       | -          |

**Table 2.** Running time

|            | Time         |          |          |            |
|------------|--------------|----------|----------|------------|
|            | HYBRIDSPADES | Cerulean | selfPBcR | hybridPBcR |
| ECOLI100   | 1h:11m       | 1h:33m   | 1h:10m   | 2d:22h:17m |
| ECOLI200   | 1h:28m       | 4h:16m   | 2h:57m   | 3d:15h:43m |
| ECOLI-NANO | 1h:15m       | -        | -        | -          |
| MRUBER     | 22m          | 33m      | 3h:38m   | 16h:12m    |
| STREPTO    | 5h:53m       | 1h:27m   | -        | 10h:24m    |
| TM6        | 1h:12m       | 1h:10m   | 1h:50m   | -          |

### 1.3 Datasets

#### 1. *Streptomyces PAMC26508*:

- Reference genome: Accession number CP003990.1
- Illumina reads: Accession number SRR628254
- PacBio reads: Accession number SRX208159

#### 2. *E. coli K12 subsp MG1655*:

- Reference genome: Accession number U00096.2

- Illumina reads: Accession number ERA000206
- PacBio reads: Available at PacBio DevNet, <https://github.com/PacificBiosciences/DevNet/wiki/E.-coli-20kb-Size-Selected-Library-with-P6-C4> and <https://github.com/PacificBiosciences/DevNet/wiki/E.-coli-20kb-Size-Selected-Library-with-P4-C2>

- Nanopore reads: Accession number ERX593920

#### 3. *M. ruber DSM 1279*:

- Reference genome: Accession number NC\_013946.1
- Illumina reads: Available at Illumina BaseSpace, <https://basespace.illumina.com/sample/15029026/mei01>
- PacBio reads: Accession number SRX260496

#### 4. *candidate division TM6 bacterium JCVI TM6SC1*:

- Reference assembly: Accession number ASM38563v1
- Illumina reads: <http://spades.bioinf.spbau.ru/tm6/>
- PacBio reads: <http://spades.bioinf.spbau.ru/tm6/>

**Table 3.** Statistics of datasets containing long reads. To define “N50 read length” parameter, we ordered all reads in the decreasing order of their lengths and computed their total length *TotalLength*. We further selected the minimum number of reads from the top of this list whose total length exceeds *TotalLength/2*. The parameter “N50 read length” is defined as the length of shortest read in the selected dataset. .

|            | Long reads   |                 |              |
|------------|--------------|-----------------|--------------|
|            | longest read | N50 read length | av. coverage |
| ECOLI100   | 22609        | 7566            | 94           |
| ECOLI200   | 41390        | 15724           | 208          |
| ECOLI-NANO | 115979       | 7566            | 144          |
| MRUBER     | 15409        | 3542            | 124          |
| STREPTO    | 7844         | 2376            | 25           |
| TM6        | 21827        | 3145            | 44           |

**Table 4.** Statistics of datasets containing short reads.

|                                   | Short reads |             |                  |
|-----------------------------------|-------------|-------------|------------------|
|                                   | read length | insert size | average coverage |
| <i>E. coli str. K12</i>           | 100         | 215         | 230              |
| <i>M. ruber DSM 1279</i>          | 150         | 3500        | 20               |
| <i>Streptomyces sp. PAMC26508</i> | 150         | 280         | 95               |
| TM6                               | 100         | 270         | 265              |
